# Supplementary material
Source: Springer Nature journal article supplement (https://www.springermedizin.de/resource/supplementary/12936_2014_3305_MOESM4_ESM.pdf/9545576)

**(a)**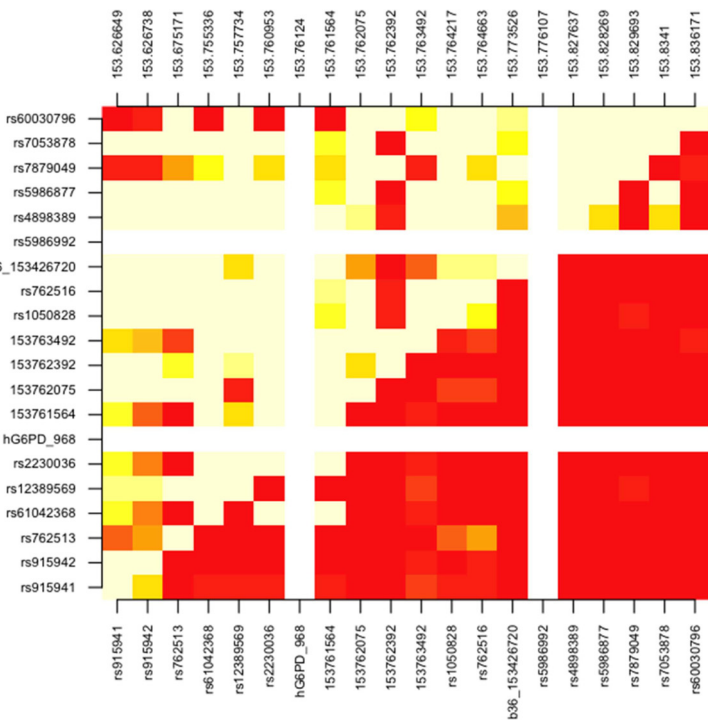**(b)**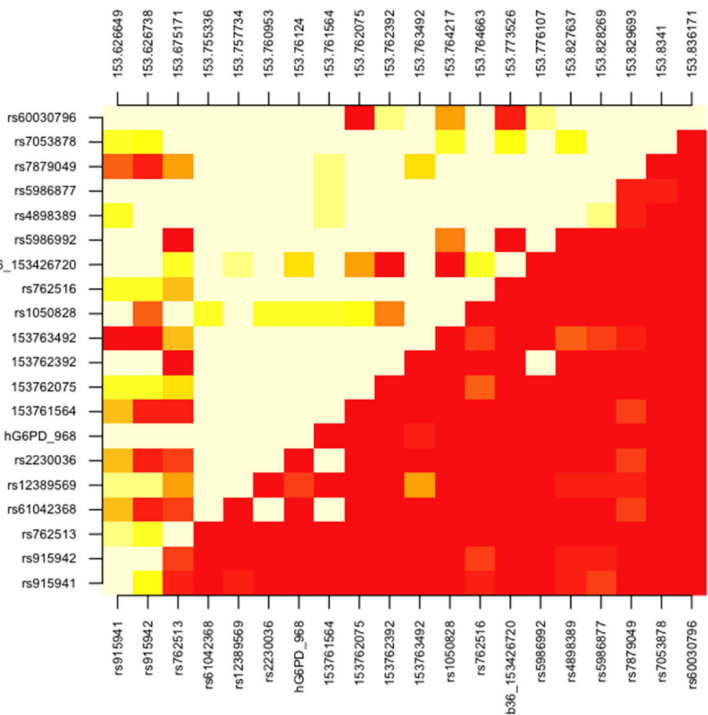

Supplement: MOESM4 [file 9545576]
